# Supplementary material
Source: publisher site journal article supplement (https://www.dovepress.com/article/235298)
Supplement: Supplementary file 1 [file get_supplementary_file.php]

**Supplementary Material**

**Appendix 1** NLP querying logic

| **Cohort age logic** |
| --- |
| Age region 0-17 |
| Specialty contains pediatri* |
| 2-word-gap phrase “is a/an” |
| “teen” |
| “pre-teen” |
| “toddler” |
| “baby” |
| “month-old” |
| “boy” |
| “girl” |
| Adolescent (MeSH ontology) |
| Child (MeSH ontology) |
| Infant (MeSH ontology) |
| “tween” |
| 0-17 ‘year old’ |
| DOB & year combinations |
| DOB ≥1999 & Date 2016 |
| DOB ≥2000 & Date 2017 |
| DOB ≥2001 & Date 2018 |
| 2-word-gap phrase: is an/a, goes to, attends, student at |
| Elementary |
| Grade |
| Gradeschool |
| Middle |
| Intermediate |
| Junior highschool/high-school/high school |
| Highschool/high-school/high school |
| **Symptoms logic** |
| Elevated heart rate/palpitations/fast/irregular heart beat/heart beating fast/loud/hard |
| Tachycardia (ontology) |
| Palpitations (ontology) |
| Confused/disoriented/fuzzy thinking/cognitive disorder/concentration problems |
| Cognitive dysfunction (MeSH & NCI) |
| Disturbance in attention (MedDRA 19.1) |
| Concentration impairment (NCI) |
| Unable to concentrate (SNOMED) |
| Confusion (MeSH & NCI) |
| Tremor/trembling/tingling/shaking |
| Tremors (MeSH & NCI) |
| “Shaking” |
| “Trembling” |
| Paraesthesia (MedDRA - includes “tingling”) |
| Blurred vision/blurry/vision impairment/difficulty seeing/focusing |
| Blurred vision (Human Phenotype & MedDRA) |
| Visual loss (Human Phenotype) |
| Abnormal vision (SNOMED) |
| Slurred/changed speech + NOT stroke + NOT substance abuse/alcohol |
| Difficulty speaking (SNOMED) |
| Slurred speech (Human Phenotype) |
| Dysarthria (MedDRA) |
| NEGATE: |
| Stroke (MeSH & NCI) |
| Substance-related disorders (MeSH & NCI) |
| Alcoholism (MeSH & NCI) |
| Irritable/anxious/nervous/frantic/upset/distraught |
| “anxi*” |
| “nervous*” |
| “upset” (negate “stomach, abdomin*, gastro*, gi, within 1w) |
| “distraught” |
| Irritability (Human Phenotype) |
| Mood/behavior change; unusual/different/odd acting (thinking) + NOT substance abuse/alcohol |
| Mood altered (MedDRA) |
| "Behavior change"  “Act*” / “think*” "unusual" / "odd"  NEGATE: |
| Substance-related disorders (MeSH & NCI) |
| Alcoholism (MeSH & NCI) |
| Sweat(y)/clammy/perspiring |
| Hyperhidrosis (MedDRA) |
| “Sweat*” |
| Cold sweat (MedDRA) |
| “Perspir*” |
| **Confounders logic** |
| Cancer |
| Urinary bladder (MeSH & NCI) |
| Breast neoplasms (MeSH & NCI)  Colonic neoplasms (MeSH & NCI) |
| Rectal neoplasms (MeSH & NCI) |
| Kidney neoplasms (MeSH & NCI) |
| Leukemia (MeSH & NCI) |
| Lung neoplasms (MeSH & NCI) |
| Melanoma (MeSH & NCI) |
| Non-Hodgkin lymphoma (MeSH & NCI) |
| Pancreatic neoplasms (MeSH & NCI) |
| Prostatic neoplasms (MeSH & NCI) |
| Thyroid neoplasms (MeSH & NCI) |
| “Malignant” |
| “Cancer”  “Cancerous” |
| “Carcinoma” |
| Hyperglycemia/DKA |
| Hyperglycemia (MeSH & NCI) |
| Diabetic ketoacidosis (MeSH & NCI) |
| “Blood sugar/glucose” >200 “mg/dL” |
| GI disorders (MeSH & NCI) |
| Anemia (MeSH & NCI)  Stroke/cerebrovascular disorders |
| Stroke (MeSH & NCI) |
| Cerebrovascular disorders (MeSH & NCI) |
| Substance abuse/alcohol |
| Substance-related disorders (MeSH & NCI) |
| Substance use (MedDRA) |
| Alcoholism (MeSH & NCI) |
| Behavioral/mental illness |
| Psychiatric disorder (NCI) |
| Mental disorders (MeSH & NCI) |
| “Suicidal” |
| Mania (MedDRA) |
| Bipolar disorder (MeSH & NCI) |
| Dementia (MeSH & NCI) |
| **Comorbidities logic** |
| Obesity (MeSH & NCI) |
| Hyperlipidemia/hypercholesterolemia/dyslipidemia |
| Hyperglycemia (MeSH & NCI) |
| Diabetic ketoacidosis (MeSH & NCI) |
| “Blood sugar/glucose” >200 “mg/dL” |
| Hypertension (MeSH & NCI) |
| CVD (MeSH & NCI) |
| NEGATE: Heart failure (MeSH & NCI) |
| Heart failure (MeSH & NCI) |
| Renal insufficiency (MeSH & NCI) |
| **Potential confounders logic** |
| High blood sugar/hyperglycemia/diabetic ketoacidosis |
| Hyperglycemia |
| Diabetic ketoacidosis |
| Cancer/malignancy (solid tumor or hematological malignancy/lymphoma/leukemia) |
| Urinary bladder (MeSH & NCI) |
| Breast neoplasms (MeSH & NCI) |
| Colonic neoplasms (MeSH & NCI) |
| Rectal neoplasms (MeSH & NCI) |
| Kidney neoplasms (MeSH & NCI) |
| Leukemia (MeSH & NCI) |
| Lung neoplasms (MeSH & NCI) |
| Melanoma (MeSH & NCI) |
| Non-Hodgkin lymphoma (MeSH & NCI) |
| Pancreatic neoplasms (MeSH & NCI) |
| Prostatic neoplasms (MeSH & NCI) |
| Thyroid neoplasms (MeSH & NCI) |
| “Malignant” |
| “Cancer” |
| “Cancerous” |
| “Carcinoma” |
| Stroke/cerebrovascular disease |
| Stroke (MeSH & NCI) |
| Cerebrovascular disorders (MeSH & NCI) |
| Gl disorders (MeSH & NCI) |
| Anemia (MeSH & NCI) |
| Behavioral/mental illness |
| Psychiatric disorder (NCI) |
| Mental disorders (MeSH & NCI) |
| Dementia (MeSH & NCI) |
| Substance use (MedDRA) |
| **Clinical characteristics logic** |
| Blood glucose level  Blood glucose level - finding (SNOMED) |
| Hb1Ac (MedDRA) |
| Smoking (ever)  “Smoke*” |
| “Smoking” |
| “Tobacco use/abuse” (3w phrase) |
| NEGATE: |
| “Does not” |
| “Never” |
| “No history of” |
| “Denies” |
| “No” |
| **Antidiabetic medications logic** |
| “Amylin” |
| Metformin (NCI) |
| Sulfonylureas (RxNorm) |
| Meglitinides (NCI) |
| Thiazolidinediones (RxNorm) |
| DPP-4 inhibitors (NCI) |
| GLP-1 receptor agonists (RxNorm) |
| SGLT2 inhibitors (NCI) |
| Insulin (RxNorm) |

**Abbreviations:** CVD, cardiovascular disease; DKA, diabetic ketoacidosis; DOB, date of birth; DPP, dipeptidyl peptidase; GI, gastrointestinal; GLP, glucagon-like peptide; HbA1c, glycosylated hemoglobin; MedDRA, Medical Dictionary for Regulatory Activities; MeSH, Medical Subject Headings; NCI, National Cancer Institute; NLP, natural language processing; SGLT, sodium glucose cotransporter; SNOMED, Systematized Nomenclature of Medicine.

**Appendix 2** Prevalence of potential confounders that may be associated with symptoms of hypoglycemia

|  | **Patients with T1DM**  **N=41688**  **n (%)** | **Patients with T2DM**  **N=317399**  **n (%)** |
| --- | --- | --- |
| High blood sugar/diabetic ketoacidosis | 14067 (33.7) | 48200 (15) |
| Cancer | 6752 (16.2) | 82569 (26) |
| Stroke | 7377 (17.7) | 78395 (25) |
| Gastrointestinal disorders | 18499 (44.4) | 156428 (49) |
| Anemia | 9870 (23.7) | 87807 (28) |
| Behavioral/mental illness | 18931 (45.4) | 149145 (47) |
| Dementia | 1690 (4.1) | 24214 (8) |
| Substance use/abuse | 4917 (11.8) | 30590 (10) |

**Abbreviations:** T1DM, type 1 diabetes mellitus; T2DM, type 2 diabetes mellitus.

**Appendix 3** Patient attrition

T1DM

N = 41688 patients

T2DM

N = 317399 patients

Excluded from analysis because type of diabetes was not specified

N = 711610 patients

Mention of diabetes in the Amplity Insights transcription database for adult patients

N = 1070697 patients

**Abbreviations:** T1DM, type 1 diabetes mellitus; T2DM, type 2 diabetes mellitus.

**Appendix 4** Antidiabetic medications among patient cohorts

|  | **Patients with T1DM**  **N=41688**  **n (%)** | **Patients with T2DM**  **N=317399**  **n (%)** |
| --- | --- | --- |
| Alpha-glucosidase inhibitors | 17 (<0.1) | 504 (<0.1) |
| Amylin analogues | 65 (0.2) | 48 (<0.1) |
| Biguanides (metformin) | 5059 (12.1) | 115309 (36) |
| Bile acid sequestrants | 56 (0.1) | 738 (<0.1) |
| Combinations | 407 (1.0) | 12519 (4) |
| Dipeptidyl peptidase-4 inhibitors | 1056 (2.5) | 25677 (8) |
| Glucagon-like peptide-1 receptor agonists | 679 (1.6) | 10560 (3) |
| Insulin | 37279 (89.4) | 174171 (55) |
| Meglitinides | 101 (0.2) | 2829 (1) |
| Dopamine agonists | - | 21 (<0.1) |
| Sodium glucose cotransporter 2 inhibitors | 473 (1.1) | 8704 (3) |
| Sulfonylureas | 1846 (4.4) | 55710 (18) |
| Thiazolidinediones | 352 (0.8) | 7928 (2) |

**Abbreviations:** T1DM, type 1 diabetes mellitus; T2DM, type 2 diabetes mellitus.
